1 Title

2 **Geospatial analysis of malaria burden in Kagera region, North-western Tanzania using**  
3 **health facility and community survey data**

4 Authors

5 **Daniel A. Petro, Nyimvua Shaban, Sijenunu Aaron, Frank Chacky, Samwel Lazaro,**  
6 **Maciej F. Boni, and Deus S. Ishengoma**

7 Corresponding author: Daniel Anderson Petro

8 Phone number: +255762001943

9 Email address: [petrodaniel945@gmail.com](mailto:petrodaniel945@gmail.com)

10 Author affiliations: University of Dar es Salaam, Dar es Salaam, Tanzania (D.A. Petro, N.  
11 Shaban); National Malaria Control Programme, Dodoma, Tanzania (S. Aaron, F. Chacky, S.  
12 Lazaro); Temple University, Philadelphia, USA (M.F. Boni); National Institute for Medical  
13 Research; Kampala International University, Dar es Salaam, Tanzania (D.S. Ishengoma)

14 Running title: Geospatial burden of malaria in Kagera region, TZ

15 Keywords: Malaria, malaria hotspots, artemisinin partial resistance, spatial autocorrelation,  
16 Kagera, Tanzania

17 **Abstract**

18 Generating evidence of malaria burden in areas with confirmed artemisinin partial resistance  
19 (ART-R) is the first step before developing a response strategy to the resistance. In this study,  
20 we assessed the burden of malaria in Kagera region (with recently confirmed ART-R) by  
21 geospatial analysis using data from health facilities (HFs) and community surveys from 2017 to

22 2023. In 2983717/8124363 patients from HFs, rapid diagnostic test positivity rate was 36.7%  
23 (range: 0-80%) and was similar in patients aged under-fives (33.1%, range: 0-79%) and  $\geq 5$   
24 years (33.7%, range: 3-80%). The prevalence of malaria was 10.0% (range: 0-40.5%,  
25  $n=84999/ 853761$ ) in pregnant women but it was 26.1% (3409/13065) in school children  
26 (range: 0-78.4%). We identified hotspots and coldspots, and persistently high burden in 69/192  
27 wards, school children, and patients aged  $\geq 5$  years, providing evidence for planning and  
28 developing an ART-R response for the region.

29 Tanzania is one of the priority countries defined by the World Health Organization (WHO) as a  
30 high-burden high-impact country; it accounted for an estimated 3.2% of all malaria cases and  
31 4.4% of deaths reported worldwide in 2022 (1). In Tanzania, about 96% of all cases are  
32 caused by *Plasmodium falciparum*, and the remaining are due to other species (*P. malariae*  
33 and *P. ovale*) individually or in mixed infections (2–4). The National Malaria Control  
34 Programme’s (NMCP) strategy is to reduce the malaria burden and progress to substantially  
35 control and eliminate using different effective interventions. The main strategies include  
36 integrated malaria vector control (mainly with insecticide-treated nets), case management,  
37 preventive therapies, and other supportive strategies (5). However, progress to malaria  
38 elimination is under key biological threats such as the emergence and spread of insecticide (6)  
39 and antimalarial drug resistance (7), emergence of parasites with histidine-rich protein 2/3  
40 (*hrp2/3*) gene deletions (8), and invasive vector species (*Anopheles stephensi*) in some  
41 malaria-endemic countries in Africa (1).

42 Malaria transmission in Tanzania is heterogeneous with 93% of the population living in  
43 areas where transmission occurs (5). Regions with very low and low transmission risk are  
44 located in the central, northeastern, and southwestern parts surrounded on both sides by

45 moderate transmission regions and high transmission in the northwestern, southern, and  
46 western parts (9). Various factors including the types of mosquito vectors, environmental  
47 conditions, and other human-related factors are responsible for the current pattern of malaria  
48 transmission in Tanzania (10–12).

49 Over the past four decades, malaria-endemic countries in sub-Saharan Africa have  
50 reported resistance of *P. falciparum* to all major antimalarial drugs, including chloroquine,  
51 sulfadoxine-pyrimethamine (SP) (7), and artemisinin derivatives and their currently used  
52 partner drugs (13,14). Nevertheless, artemisinin-based combination therapies (ACTs) are still  
53 highly effective against parasites of African origin (7). However, artemisinin partial resistance  
54 (ART-R) has been confirmed in Rwanda (15,16), Uganda (17), Tanzania (18) and Eritrea (19),  
55 and one particular genotype has only been detected in the Horn of Africa, in Ethiopia (20),  
56 Somalia (21) and Sudan (22,23). In addition, the mutation that originated in Rwanda has been  
57 also reported in Kenya (24). In Tanzania, little was known about ART-R until in 2021 when a  
58 country-wide survey through the project on molecular surveillance of malaria in Tanzania  
59 (MSMT) reported a focus in Kagera region only, with high frequency (0.077) of parasites with  
60 mutations in Kelch13 gene (*K13*) and as high as 0.22 in Karagwe District Council (DC) which  
61 are linked to ART-R in Africa (25). Based on WHO's criteria (7), a follow-up therapeutic  
62 efficacy study conducted in 2022 confirmed the presence of ART-R in the region although the  
63 tested drugs still had high efficacy exceeding 98.0% (18).

64 As per WHO's strategy to respond to ART-R in Africa, when resistance is confirmed,  
65 new strategies to contain, prevent, and mitigate the spread and consequences of ART-R must  
66 be considered urgently (26). As the first step towards the development of a response strategy,  
67 WHO recommends mapping and providing a detailed profile of the disease burden and its

68 spread in different areas (27). Therefore, this study aimed to investigate the temporal trends  
69 and spatial patterns of malaria burden in Kagera region and identify areas at the highest or  
70 lowest risk of malaria transmission as an initial stage towards the development of a response  
71 to ART-R in Tanzania. The findings from this study provide the government and other  
72 stakeholders with evidence to support the designing, deployment, and implementation of  
73 interventions to monitor, prevent, and contain the spread of ART-R within the region and to  
74 other areas of Tanzania.

## 75 **Material and Methods**

### 76 **Study design and site**

77 This study utilized aggregated secondary data collected retrospectively from health facilities  
78 (HFs) and community surveys in Kagera region of north-western Tanzania. The region  
79 consists of 8 councils, 192 wards, and 734 villages covering an area of approximately 35868  
80 square kilometers. A description of the region's geographical boundaries and the source of its  
81 economy is provided in Appendix A.

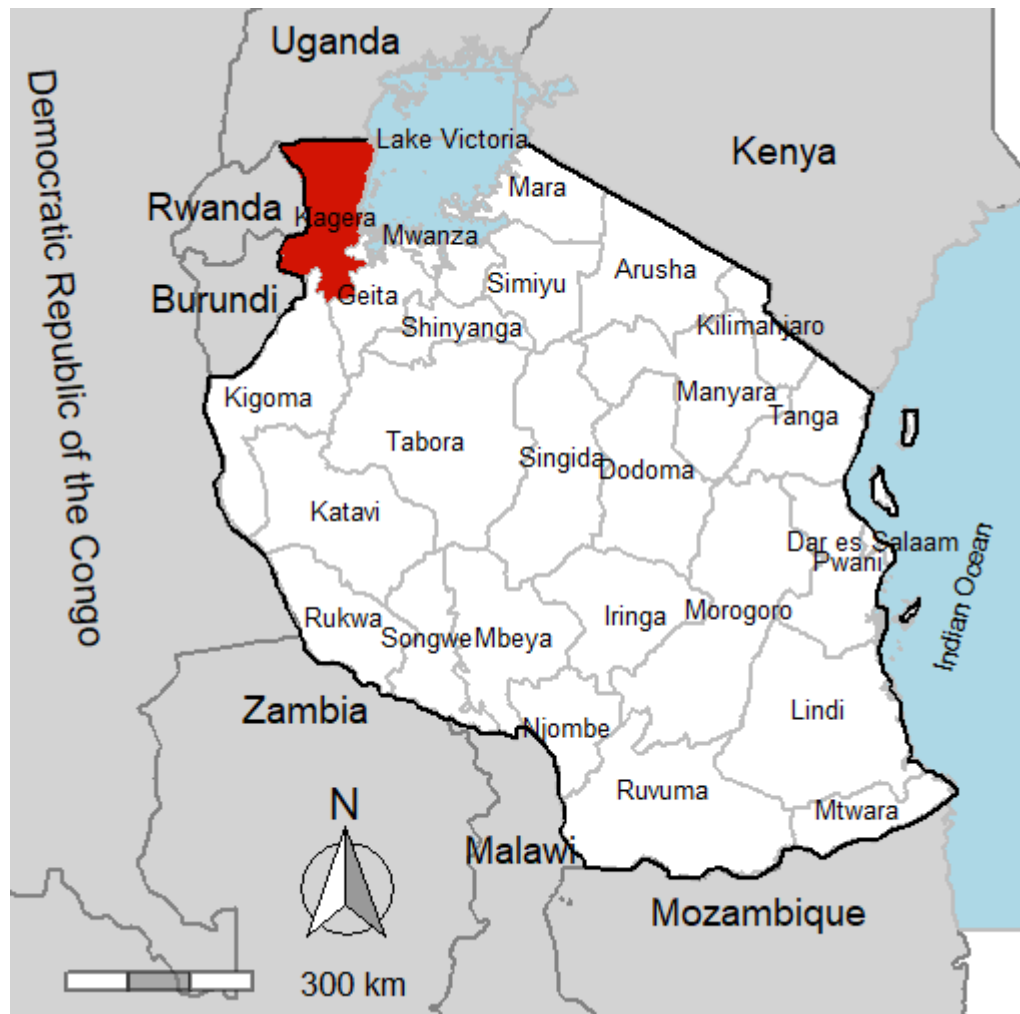

82

83 **Figure 1.** A map showing the 26 regions of Mainland Tanzania (white) and Kagera region (red), Lake Victoria and  
84 Indian Ocean (lightblue), and neighboring countries (gray).

### 85 **Data collation, management, and analysis**

86 The data for this were downloaded from the District Health Information System – version 2  
87 (DHIS2), a web-based software platform for reporting, analyzing, storing, and disseminating  
88 health data. This (DHIS2) is an electronic format for the paper-based Health Management  
89 Information System of the Tanzania Ministry of Health which is used by HFs to collect and  
90 report their routine data (5). The description of how the information is entered and maintained  
91 as well as quality control of the data is given elsewhere (9,28). The data used in this study

92 included monthly malaria testing of pregnant women attending first antenatal care (ANC)  
93 clinics, symptomatic malaria patients seeking care at HFs (aged under-fives and  $\geq 5$  years)  
94 both from 2017 to 2023 and school children through school malaria parasitological surveys  
95 (SMPS) of 2015, 2017, 2019, and 2021 from the 37 selected wards in all councils of Kagera  
96 region.

97 Using Excel ([Office 2013](#)) and R software version 4.3.2: ([www.r-project.org](http://www.r-project.org)), data  
98 cleaning and preprocessing were done to ensure accuracy and consistency (Appendix B).  
99 Monthly data of total malaria tests performed and positive tests (by RDTs) reported by all HFs  
100 in the region were aggregated to provide annualized estimates. Malaria test-positivity rate  
101 (TPR) and prevalence were defined as the proportion of positive malaria tests among all  
102 malaria tests in patients aged under-fives and  $\geq 5$  years, and pregnant women, respectively.  
103 For school children, the average prevalence for each council and ward was used. Using R  
104 software, data analysis was done for overall, per year and study group, council-wise, and at  
105 ward level, and the results presented in tables, figures or text. Python plotting tools (pandas  
106 v2.2.0, matplotlib v3.8.2, numpy v1.26.3) ([Python.org](http://Python.org)) were used to show temporal trends of  
107 TPR and prevalence in the councils.

108 Kruskal-Wallis test was used to assess for any significant differences in malaria burden  
109 among councils, wards, and across years. Data on administrative boundaries of Tanzania at  
110 lower levels and its neighboring countries were downloaded from various sources including the  
111 Tanzanian [National Bureau of Statistics](#) (NBS), [gadm.org](http://gadm.org), and [naturalearthdata.com](http://naturalearthdata.com) accessed  
112 via the R package *rnaturalearth* v1.0.1. These were used to create the study site and used for  
113 choropleth mapping, spatial autocorrelation (SA), and hotspot analysis. The spatial distribution  
114 of malaria burden in the region was mapped using R packages *ggplot2* v3.5.1 and *sf* v1.0.15.

115 To investigate the spatial and temporal patterns of malaria burden in the region, the Global  
116 Moran's Index was calculated for each group and year. The value of this index ranges from -1  
117 (negative SA) to +1 (positive SA) (29,30). For hotspot analysis, local spatial statistical methods  
118 were applied through a *spdep* package v1.3.3 found in R software. The description of wards  
119 and HFs included in the analysis is found in Appendix B and Figure 1, while the cut-offs  
120 applied to characterize malaria prevalence were; <1% (very low), 1 - <5% (low), 5 -<30%  
121 (moderate), and  $\geq 30\%$  (high) as previously described (31,32). For malaria TPR, the cut-offs  
122 were <5% (very low), 5-<15% (low), 15-<30% (moderate), and  $\geq 30\%$  (high) (Appendix C and  
123 Table 1). The formulae and illustration of how SA and hotspot analysis were conducted can be  
124 found elsewhere (29,30) and in Appendix D.

## 125 **Results**

### 126 **Reported malaria cases from Health Facilities (HFs)**

127 In the HFs in Kagera region, 36.7% of patients (range: 0-80%; n = 2983717/8124363) with  
128 malaria-like symptoms seeking care from 2017 to 2023, had RDT-positive results. The TPRs  
129 were similar in patients aged under-fives (33.1%, range: 0-79%) and  $\geq 5$  years (33.7%, range:  
130 3-80%), with clear geographic and temporal variations ( $p < 0.001$ ). Among under-fives, most of  
131 the wards in the high stratum (TPR  $\geq 30\%$ ) were from rural areas while wards in the very low  
132 stratum (TPR <5%) came from urban areas (Appendix Table 2). Furthermore, five councils had  
133 >10% of the wards with consistently high TPR ( $\geq 30\%$ ) throughout the years. These included  
134 6/17 (35.3%) wards in Biharamulo DC, 12/43 (27.9%) in Muleba DC, 5/22 (22.7%) in Ngara  
135 DC, 4/23 (17.4%) in Karagwe DC and 4/29 (13.8%) in Bukoba DC. In Kyerwa DC, only 2/24  
136 (8.3%) wards had consistently higher TPRs while only one ward (Kashai in Bukoba MC)  
137 recorded the lowest TPR (<5%) (Appendix Table 4).

138

139 Among patients aged  $\geq 5$  years, the pattern was similar to that of under-fives, with a  
140 large number of wards observed in the high stratum throughout the years (Appendix Table 3).  
141 Similar to under-fives, the same five councils had  $>10\%$  of the wards with consistently high  
142 TPRs ( $\geq 30\%$ ) over the years and these included, 7/17 (41.2%) wards in Biharamulo DC, 7/23  
143 (30.4%) in Karagwe DC, 11/43 (25.6%) in Muleba DC, 5/22 (22.7%) in Ngara DC, and 4/29  
144 (13.8%) wards in Bukoba DC. Only 1/24 (4.2%) ward in Kyerwa DC had consistently higher  
145 TPR ( $\geq 30\%$ ) (Appendix Table 4) (**Figure 2B**).

146

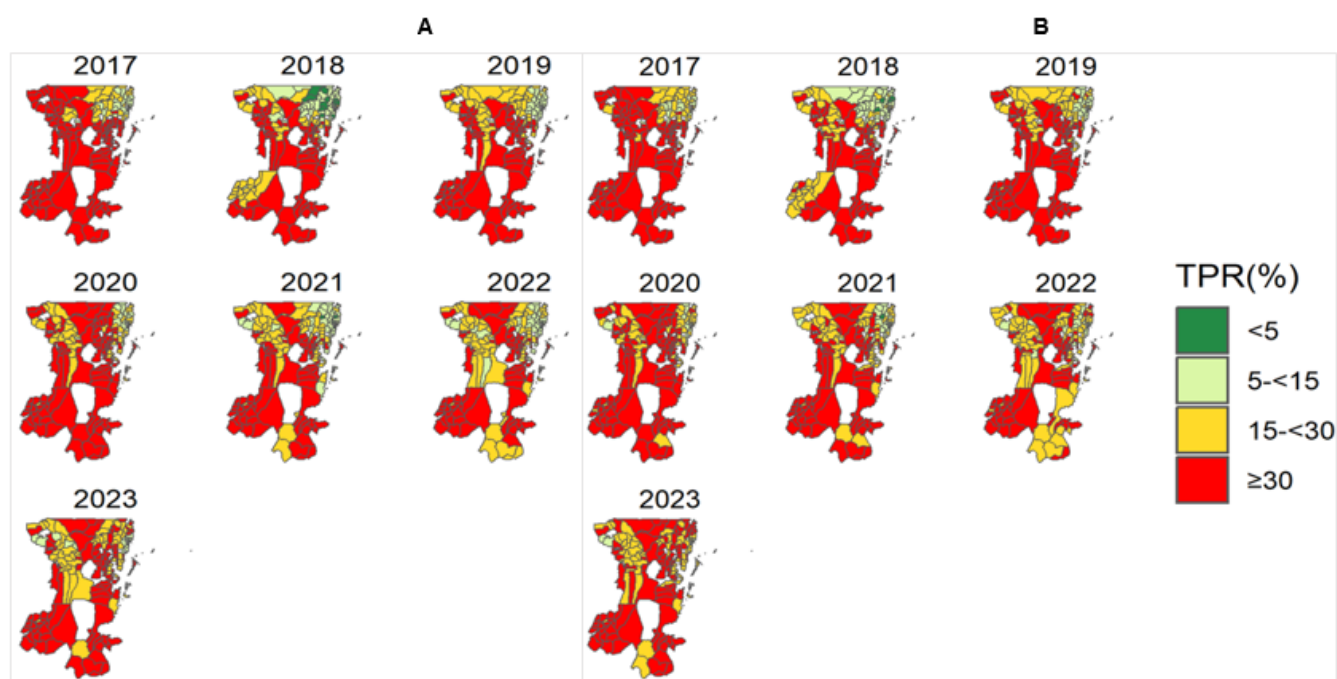

147 **Figure 2.** Spatial distribution of malaria test positivity rates (TPRs) in (A) under-fives (B) patients aged  $\geq 5$  years at  
148 ward level in Kagera region from 2017 to 2023. White areas are wards excluded from the analysis

### 149 **Monthly variations of test positivity rates (TPRs) at health facility level**

150 Monthly malaria TPR was higher ( $\geq 30\%$ ) in patients aged  $\geq 5$  years compared to under-fives in  
151 all councils (in Muleba DC, Ngara DC, Biharamulo DC, Bukoba DC, and Karagwe DC) and the  
152 pattern was similar in all years, except in Bukoba MC which recorded the lowest TPR ( $<5\%$ ) in



153 both age groups. In all councils except Bukoba MC and Missenyi DC, TPRs less than 20%  
154 were rarely observed (**Figure 3**).

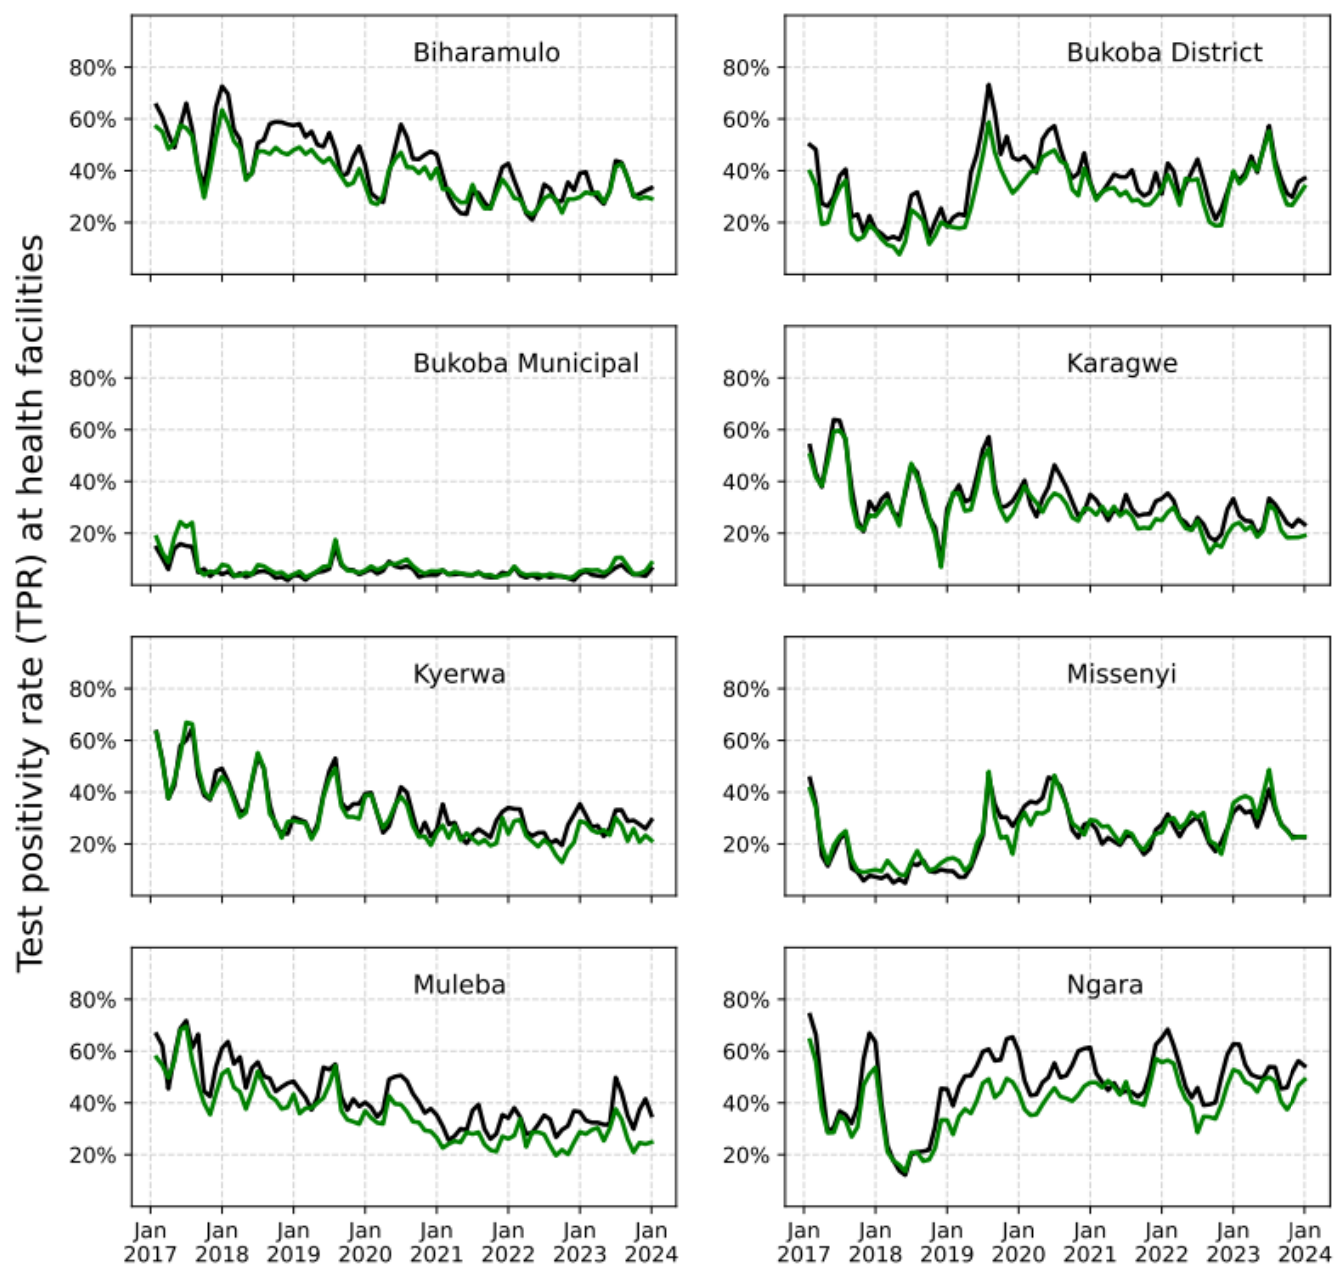

155

156 **Figure 3.** Monthly test positivity rates (TPRs) at health facility level in eight councils of Kagera region in patients  
157 aged under-fives (green) and  $\geq 5$  years (black) from 2017 to 2023.

158

159

160 **Malaria prevalence among pregnant women**

161 From 2017 to 2023, the prevalence of malaria in pregnant women was 10.0% (range: 0-40.5%,  
162 n=84999/ 853761), with significant differences among wards and across years ( $p < 0.001$ ). The  
163 prevalence was consistently higher in Biharamulo DC, Karagwe DC, Muleba DC, and Kyerwa  
164 DC, and low in Bukoba MC (<1%) throughout the years (**Figure 4**).

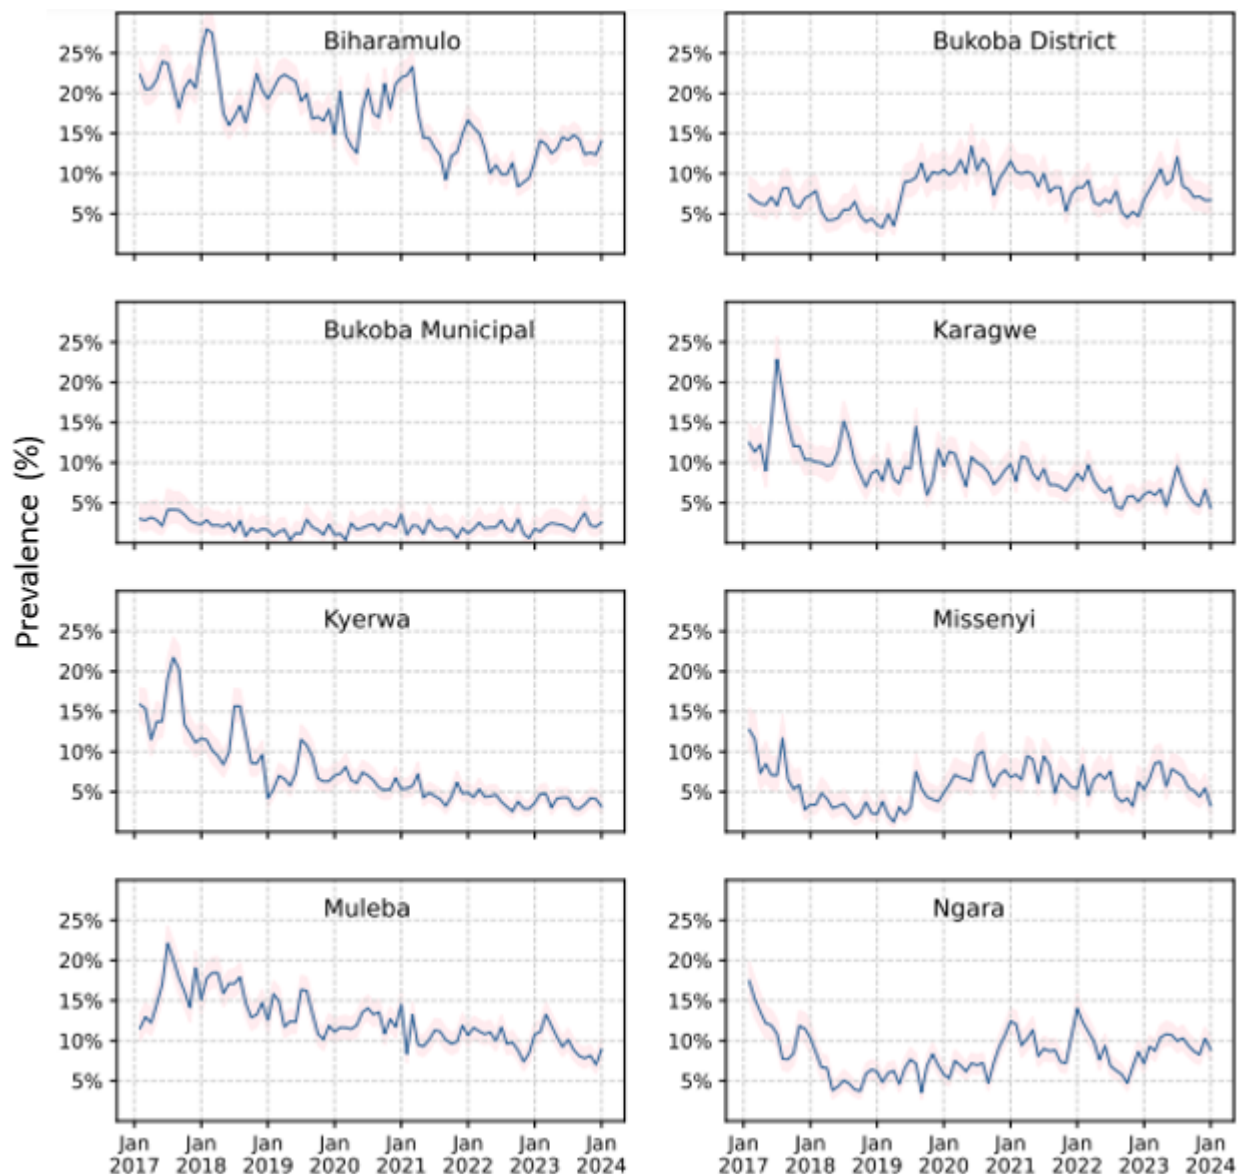

165  
166 **Figure 4.** Trends of malaria prevalence in pregnant women by council, in Kagera region from 2017 to 2023. The  
167 pink-shaded regions show the Clopper-Pearson 95% confidence bands.

168 The largest number of wards (76.8%, n=116/151) were located in the moderate stratum  
169 while the lowest (0.6%, n=1/159) was in the high-risk stratum of prevalence (Appendix Table  
170 5). In addition, only 3/8 (37.5%) councils had  $\geq 5\%$  of the wards with higher prevalence ( $\geq 30\%$ )  
171 (including 3/17 (17.6%) wards in Biharamulo DC, 4/43 (9.3%) in Muleba DC and 2/23 (8.7%)  
172 wards in Karagwe DC) while Kyerwa DC (n=1/24, 4.2%) and Bukoba DC (n=1/29, 3.4%) had  
173  $<5\%$  of the wards with high prevalence. At least 5% of the wards from Bukoba DC (n=2/29,  
174 6.9%) and Missenyi DC (n = 1/20, 5%) consistently recorded the lowest prevalence (Appendix  
175 Table 6) (**Figure 5**).

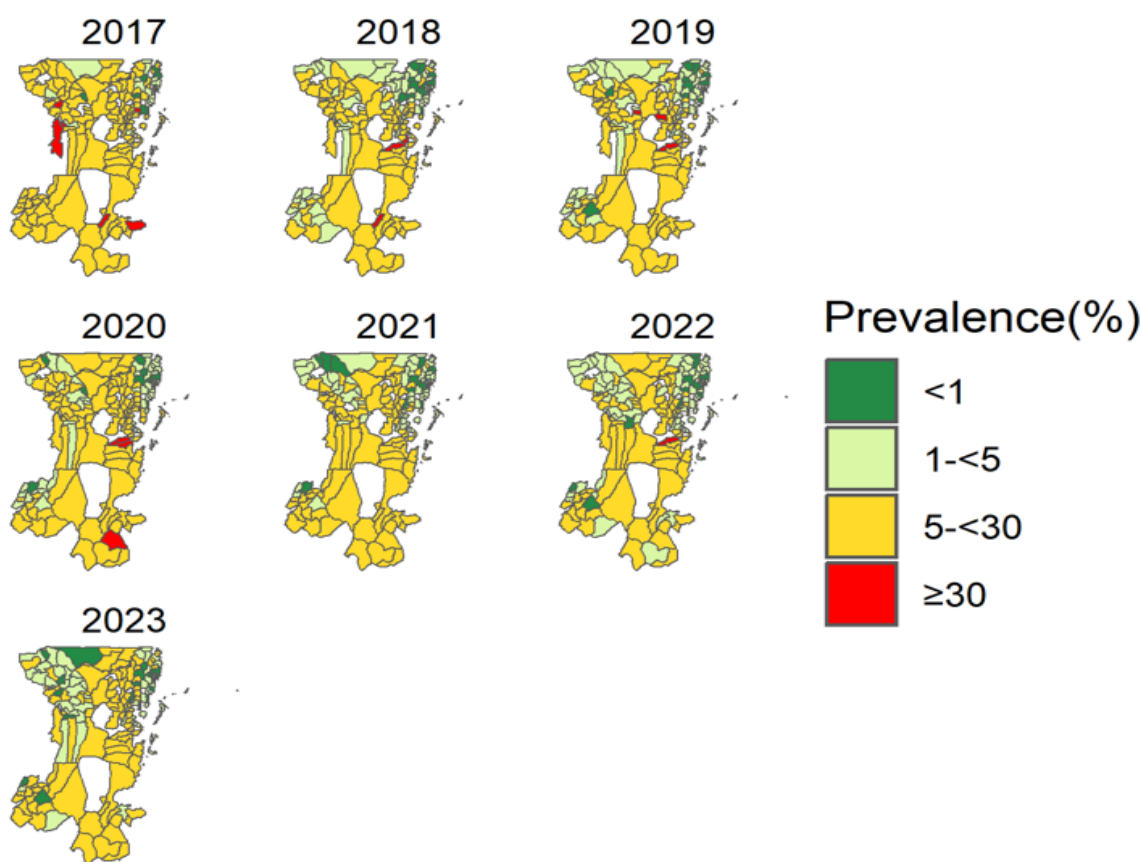

176  
177 **Figure 5.** Spatial distribution of malaria prevalence in pregnant women at ward level in Kagera region from  
178 2017 to 2023. White areas are wards excluded from the analysis.

179

180

## 181 Malaria prevalence in school children

182 The prevalence of malaria in school children was 26.1% (range: 0-78.4%; n=3409/1306)  
183 (Appendix E). A large number of wards (19/34, 55.9%) were located in the high stratum  
184 ( $\geq 30\%$ ) and few wards (1/34, 2.9%) came from areas with very low stratum ( $<1\%$ ) (Appendix  
185 Table 7). Furthermore, two wards from Ngara DC and two from Bukoba DC had persistently  
186 higher prevalence ( $\geq 30\%$ ) throughout the study period, while no ward recorded the lowest  
187 prevalence ( $<1\%$ ) for all years (Appendix Table 8) (**Figure 6**).

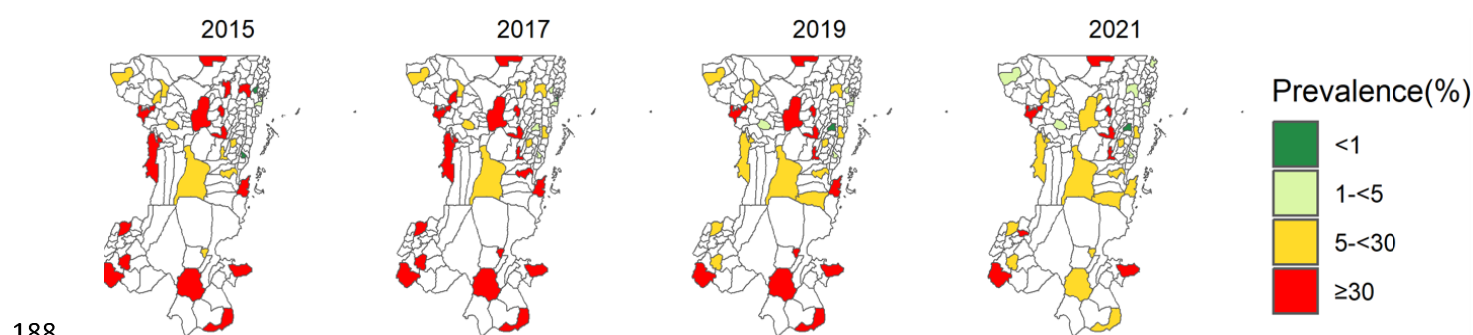

189 **Figure 6.** Spatial distribution of malaria prevalence in school children at ward level in Kagera region for 2015,  
190 2017, 2019, and 2021 surveys. White areas are wards not selected for the survey or excluded from the  
191 analysis.

## 192 Overall malaria test positivity rates at ward level

193 Among patients aged between under-fives and  $\geq 5$  years, a declining trend was observed in  
194 under-fives and started to shift to older patients at the same time (Appendix Table 9). In both  
195 age groups, an increasing trend was observed in 2023 (Appendix Figure 2).

## 196 Overall malaria prevalence at ward level

197 Malaria prevalence was higher in school children than in pregnant women, a trend that was  
198 similar across years (Appendix Figure 3). Furthermore, prevalence in pregnant women showed  
199 a decreasing trend with minor variability before 2022 but increased by approximately 15% in  
200 2023 (Appendix Table 9).

201 **Global spatial autocorrelation analysis of malaria burden**

202 Malaria burden in the region was clustered in under-fives, patients aged  $\geq 5$  years, and  
203 pregnant women. Councils/wards with high/low burden were surrounded by other areas  
204 with high/low values as well for all years and the observed patterns were statistically  
205 significant ( $p < 0.05$ ) in all groups except school children (**Tables 1 and 2**).

206 **Table 1.** Results of global spatial autocorrelation of malaria test positivity rates in patients aged under-fives  
207 and  $\geq 5$  years in Kagera region

| Group          | Year | Global moran's index | z score | p value           | Pattern   |
|----------------|------|----------------------|---------|-------------------|-----------|
| Under-fives    | 2017 | 0.7281               | 12.621  | <b>&lt;0.0001</b> | Clustered |
|                | 2018 | 0.7522               | 13.263  | <b>&lt;0.0001</b> | Clustered |
|                | 2019 | 0.7815               | 13.771  | <b>&lt;0.0001</b> | Clustered |
|                | 2020 | 0.7391               | 13.528  | <b>&lt;0.0001</b> | Clustered |
|                | 2021 | 0.6745               | 12.331  | <b>&lt;0.0001</b> | Clustered |
|                | 2022 | 0.6724               | 12.084  | <b>&lt;0.0001</b> | Clustered |
|                | 2023 | 0.5229               | 9.440   | <b>&lt;0.0001</b> | Clustered |
| $\geq 5$ years | 2017 | 0.6561               | 11.392  | <b>&lt;0.0001</b> | Clustered |
|                | 2018 | 0.6852               | 12.091  | <b>&lt;0.0001</b> | Clustered |
|                | 2019 | 0.6806               | 11.995  | <b>&lt;0.0001</b> | Clustered |
|                | 2020 | 0.6104               | 11.197  | <b>&lt;0.0001</b> | Clustered |
|                | 2021 | 0.6324               | 11.572  | <b>&lt;0.0001</b> | Clustered |
|                | 2022 | 0.5779               | 10.413  | <b>&lt;0.0001</b> | Clustered |
|                | 2023 | 0.4784               | 8.709   | <b>&lt;0.0001</b> | Clustered |

208

209

210

211

212 **Table 2.** Year-wise results of global spatial autocorrelation of malaria prevalence in Kagera region

| Group             | Year | Global Moran's Index | z-score | p-value | Pattern   |
|-------------------|------|----------------------|---------|---------|-----------|
| ANC*              | 2017 | 0.3556               | 6.2041  | <0.0001 | Clustered |
|                   | 2018 | 0.5267               | 9.2397  | <0.0001 | Clustered |
|                   | 2019 | 0.5518               | 9.663   | <0.0001 | Clustered |
|                   | 2020 | 0.5383               | 9.990   | <0.0001 | Clustered |
|                   | 2021 | 0.5706               | 10.294  | <0.0001 | Clustered |
|                   | 2022 | 0.4961               | 9.275   | <0.0001 | Clustered |
|                   | 2023 | 0.3487               | 6.589   | <0.0001 | Clustered |
| SMPS <sup>†</sup> | 2015 | 0.1688               | 0.7905  | 0.4292  | Clustered |
|                   | 2017 | 0.0465               | 0.4611  | 0.6448  | Clustered |
|                   | 2019 | -0.0445              | 0.1648  | 0.8691  | Dispersed |
|                   | 2021 | -0.0313              | 0.1626  | 0.8709  | Dispersed |

213 \*ANC, Antenatal Care,

214 <sup>†</sup>SMPS, School malaria parasitological survey

### 215 Hotspot analysis of malaria burden

216 Malaria hotspots were concentrated in the southern, central, and northwestern parts of Kagera  
 217 region. Four councils (Ngara DC, Biharamulo DC, Muleba DC, and Bukoba DC) had >17% of  
 218 the wards classified as malaria hotspots in patients aged under-fives and ≥5 years, and  
 219 pregnant women while Karagwe DC and Kyerwa DC had <17% of wards as malaria hotspots  
 220 in the same groups. The number of wards classified as hotspots of malaria in each group at  
 221 95% and 99% confidence levels (CLs) is presented in **Table 3** (Appendix Table 10).

222

223

224

225 **Table 3.** Number of wards per council classified as malaria hotspots in patients aged under-fives  
 226 and  $\geq 5$  years, and pregnant women in Kagera region at 95 and 99% confidence levels

| Group          | Council       | Hotspot wards                   | Hotspot wards      |
|----------------|---------------|---------------------------------|--------------------|
|                |               | at 95% CL <sup>†</sup> (n/N, %) | at 99% CL (n/N, %) |
| Under-fives    | Ngara DC*     | (19/22, 86.4)                   | (17/22, 77.3)      |
|                | Biharamulo DC | (11/17, 64.7)                   | (8/17, 47.1)       |
|                | Muleba DC     | (15/43, 34.9)                   | (12/43, 27.9)      |
|                | Bukoba DC     | (9/29, 31.0)                    | (6/29, 20.7)       |
|                | Karagwe DC    | (2/23, 8.7)                     | (1/23, 4.3)        |
|                | Kyerwa DC     | (1/24, 4.2)                     | -                  |
| $\geq 5$ years | Ngara DC      | (20/22, 90.9)                   | (16/22, 72.7)      |
|                | Biharamulo DC | (9/17, 52.9)                    | (7/17, 41.2)       |
|                | Muleba DC     | (16/43, 37.2)                   | (13/43, 30.2)      |
|                | Bukoba DC     | (8/29, 27.6)                    | (5/29, 17.2)       |
|                | Kyerwa DC     | (3/24, 12.5)                    | (1/24, 4.2)        |
|                | Karagwe DC    | (1/23, 4.3)                     | (1/23, 4.3)        |
| Pregnant women | Biharamulo DC | (13/17, 76.5)                   | (11/17, 64.7)      |
|                | Ngara DC      | (7/22, 31.8)                    | (4/22, 18.2)       |
|                | Muleba DC     | (13/43, 30.2)                   | (10/43, 23.3)      |
|                | Bukoba DC     | (7/29, 24.1)                    | (7/29, 24.1)       |
|                | Karagwe DC    | (4/23, 17.4)                    | (3/23, 13.0)       |
|                | Kyerwa DC     | (3/24, 12.5)                    | (1/24, 4.2)        |
|                | Missenyi DC   | (2/20, 10)                      | -                  |

227 \*DC, district council, <sup>†</sup>CL, confidence level. N, number of wards within a council,  
 228 n, number of wards identified as hotspots

229 On the other hand, malaria coldspots were situated in the northeast and few in the  
 230 remaining parts of the region. Three councils (Bukoba MC, Missenyi DC, and Bukoba DC) had  
 231  $>20\%$  of the wards classified as malaria coldspots in patients aged under-fives,  $\geq 5$  years, and

232 pregnant women while Kyerwa DC and Muleba DC had <20% of the wards. The number of  
 233 wards classified as malaria coldspots in each group at 95% and 99% CLs is presented in  
 234 **Table 4** (Appendix Table 11).

235 **Table 4.** Number of wards per council classified as malaria coldspots in patients aged under-fives  
 236 and ≥5 years, and pregnant women

| Group          | Council                  | Coldspot wards     | Coldspot wards     |
|----------------|--------------------------|--------------------|--------------------|
|                |                          | at 95% CL (n/N, %) | at 99% CL (n/N, %) |
| Under-fives    | Bukoba MC*               | (13/14, 92.9)      | (12/14, 85.7)      |
|                | Missenyi DC <sup>†</sup> | (17/20, 85)        | (14/20, 70)        |
|                | Bukoba DC                | (15/29, 51.7)      | (12/29, 41.4)      |
|                | Karagwe DC               | (1/23, 4.3)        | -                  |
|                | Kyerwa DC                | (1/24, 4.2)        | -                  |
|                | Muleba DC                | (1/43, 2.3)        | -                  |
| ≥5 years       | Bukoba MC                | (12/14, 85.7)      | (11/14, 78.6)      |
|                | Missenyi DC              | (17/20, 85)        | (14/20, 70)        |
|                | Bukoba DC                | (14/29, 48.3)      | (11/29, 37.9)      |
|                | Kyerwa DC                | (1/24, 4.2)        | -                  |
|                | Muleba DC                | (1/43, 2.3)        | (1/43, 2.3)        |
| Pregnant women | Bukoba MC                | (10/14, 71.4)      | (3/14, 21.4)       |
|                | Bukoba DC                | (11/29, 37.9)      | (9/29, 31.0)       |
|                | Missenyi DC              | (8/20, 40)         | (2/20, 10)         |
|                | Kyerwa DC                | (4/24, 16.7)       | -                  |
|                | Ngara DC                 | (1/22, 4.5)        | -                  |

237 \*DC, district council

238 <sup>†</sup>MC, municipal council,

239 <sup>‡</sup>CL, confidence level. N, number of wards within a council, n, number of wards identified as coldspot

240 The locations of malaria hotspots and coldspots at 95% and 99% CLs in under-fives, ≥5  
 241 years, and pregnant women respectively are indicated in Appendix Figures S4 to S6.



## 242 **Discussion**

243 This study was conducted as an initial stage to respond to ART-R as recommended by WHO  
244 (26) and aimed to undertake an assessment to generate, and provide evidence of the current  
245 burden of malaria in Kagera region where ART-R was recently confirmed (18). We used  
246 spatial statistical and disease mapping techniques to assess the local burden of malaria and  
247 identify potential malaria hotspots in Kagera region to support NMCP's efforts of developing a  
248 response strategy against ART-R. Using aggregated secondary data from multiple sources,  
249 we showed that over 35% (69/192) of all wards in Kagera region, mostly from rural areas, had  
250 a high malaria burden, with these wards being clustered across years. The TPR was higher in  
251 patients aged  $\geq 5$  years than under-fives and this is comparable to previous studies conducted  
252 in Tanzania (11, 12). The findings reported here provide important evidence to support the  
253 designing and implementation of mitigation and response strategies to recently confirmed  
254 ART-R in Kagera region and Tanzania in general.

255 Consistent with previous studies (12), this study reported high temporal and spatial  
256 heterogeneity of malaria burden at council and ward levels within the region. Most of the  
257 wards, especially from rural areas, recorded a high malaria burden for most of the years; while  
258 some wards mainly in urban and mixed/rural areas recorded the lowest burden (see Appendix  
259 Tables 4,6, and 8). This finding was consistent across years and study groups possibly due to  
260 conditions supporting malaria transmission in rural compared to urban areas as previously  
261 reported (33–35). The higher burden of malaria in rural areas is normally attributed to several  
262 factors including the presence of favorable conditions for malaria transmission in rural areas  
263 such as stagnant water bodies that tend to create desirable breeding sites for mosquito  
264 vectors (35). In addition, a large proportion of poor people tend to reside in rural areas and

265 normally live in poorly constructed houses which support higher mosquito biting rates and  
266 transmission of malaria (12,36,37). To reduce the burden in these areas, various interventions  
267 such as distribution of insecticide-treated nets (ITNs), house improvement strategies, bio-  
268 larviciding in areas that are surrounded by water bodies, and behavioral change and  
269 communication strategies need to be implemented, as these have been reported to  
270 significantly reduce malaria transmission and the burden (38,39). On the other hand, the low  
271 burden of malaria in urban areas observed in this study is consistent with previous studies  
272 (33,35). This is possibly due to the high socio-economic status of the urban population and,  
273 the availability and access to malaria treatment and control measures when compared to rural  
274 areas (35).

275 A significant clustered spatial pattern of malaria burden reported in patients aged under-  
276 fives and  $\geq 5$  years, and pregnant women within the region aligns with other studies conducted  
277 elsewhere (29,30). The reports of areas with persistently high malaria burden in the southern,  
278 central, and north-western parts of the region as reported in this study may be attributed to the  
279 presence of similar risk factors such as environmental conditions, socio-economic status,  
280 healthcare infrastructures, and the presence of suitable mosquito breeding sites that tend to  
281 create foci of malaria transmission (10,12,40). Hence, future interventions in the region to  
282 reduce the local disease burden need to be designed based on these results to target the  
283 areas that have been identified to have a persistently high burden of malaria.

284 Malaria prevalence in Kagera region was high in school children compared to pregnant  
285 women, reaching as high as 78.4% in some wards. In previous studies, it was reported that  
286 school children spend most of their time in the evening playing outside and less often use bed  
287 nets, which tends to increase their chances of mosquito bites and hence increase the risk of

288 malaria infections (41–43). To reduce malaria transmission in school children, various  
289 initiatives have been undertaken by NMCP and other stakeholders to protect this risky group  
290 including the distribution of ITNs through different channels like the school net program (5,44).  
291 However, the prevalence of malaria infections in this asymptomatic group is still high (12,45).  
292 Future studies are needed to explore more reasons and factors for this recurring observation in  
293 the region and the whole country and whether this will support the spread of the reported ART-  
294 R. On the other hand, pregnant women in Tanzania are normally given two or more doses of  
295 SP for intermittent preventive treatment as well as ITNs during their first ANC visits in HFs,  
296 which might have significantly contributed to reducing the risk of malaria infections in this  
297 group (28). However, the increasing trend of malaria prevalence in pregnant women observed  
298 in 2023 needs further follow-up to uncover all possible reasons for this change.

299         The overall malaria TPR at the ward level was high ( $\geq 30\%$ ) in both under-fives and  
300 patients aged  $\geq 5$  years with minor differences. These findings are comparable to what has  
301 been reported by previous studies in Tanzania and elsewhere (11, 12). The year-wise  
302 comparison of TPR revealed a shift of TPR from under-fives to  $\geq 5$  years, similar to previous  
303 studies (46). This may be attributed to various efforts that have been undertaken by NMCP to  
304 implement effective malaria interventions in vulnerable groups like under-fives while these  
305 interventions may not have been widely considered in older age groups (11,28). This might  
306 have led to the shift of malaria infections to individuals aged  $\geq 5$  years, with the peak of malaria  
307 prevalence reported in children aged between 5 and 15 years (11). In addition, malaria TPR in  
308 under-fives and  $\geq 5$  years showed an increasing trend in 2023. An in-depth analysis to uncover  
309 possible reasons for these epidemiological changes in the region is required so that  
310 appropriate measures can be planned, now that ART-R has been confirmed.

311 Malaria transmission in Kagera region was observed throughout the year with some of  
312 the months recording high values of TPR compared to others. This indicates that malaria  
313 transmission in the region was not seasonal; an observation that can signify the presence of  
314 other factors like population movements, changes in malaria control, or unexpected  
315 increases/decreases in breeding sites or mosquito populations (12,47,48). Causal effects for  
316 these factors are in general difficult to establish, future studies are needed to explore and  
317 uncover the key drivers of persistent malaria transmission in this malaria-endemic region in the  
318 country.

319 The findings presented here had some limitations that may be addressed in future  
320 studies. Since this study included HFs with a reporting rate of 50% or more, future studies may  
321 consider including all HFs during analysis and use different geostatistical methods to account  
322 for monthly missing data, differences in utilization of HFs, treatment-seeking behaviors, and  
323 distance to HFs. In addition, the HF data did include personal information such as age and  
324 sex, and this limited additional analysis. For instance, previous studies showed a high burden  
325 of malaria in school children (aged 5 - 15 years) but this could not be teased out because all  
326 patients aged  $\geq 5$  years were put in one group. Future studies may also include populations at  
327 risk and use incidence to track changes in the disease burden within the region.

328 Overall, malaria infections in the region were higher in most of the wards from rural  
329 areas compared to urban areas, among school children compared to pregnant women, and  
330 among patients aged  $\geq 5$  years than in under-fives. The observed heterogeneity of malaria  
331 burden underscores prioritization of Kagera region for additional malaria control mainly due to  
332 the currently circulating *P. falciparum* parasites with K13 561H genotypes in the region (18).  
333 As early and preemptive action is preferred to late response (49), identifying specific

334 resistance containment strategies (50) for 2024 and 2025 – in addition to general malaria  
335 control strategies– will be critical for slowing down the spread of artemisinin-resistant parasites  
336 from Kagera region to other parts of Tanzania.

337

338

### 339 **Biographical Sketch**

340 Mr. Petro is a doctoral student at the University of Dar es Salaam, Dar es Salaam. His  
341 research interests focus on malaria epidemiology.

### 342 **Acknowledgment**

343 The authors would like to thank the MoH through NMCP, and all members of the Department  
344 of Mathematics, University of Dar es Salaam, and MSMT project team for their participation  
345 and invaluable support to make this work complete.

346 This study was partially funded by the National Institute for Medical Research (NIMR)  
347 under the MSMT project. The MSMT project is funded in whole, by the Bill & Melinda Gates  
348 Foundation [grant number INV 02202]. Under the grant conditions of the Foundation, a  
349 Creative Commons Attribution 4.0 Generic License has already been assigned to the author of  
350 the accepted Manuscript version that might arise from this submission.

351 PAP and DSI designed the study, and SA, FC and SL supported the acquisition and  
352 cleaning of the data. DAP conducted the initial analysis under the supervision of DSI and NS.  
353 DSI, NS, and MFB were involved in the interpretation of the results. DAP and MFB performed  
354 a final analysis of the data under the guidance of DSI, and DAP drafted the initial manuscript.  
355 All co-authors contributed to the revision of the initial draft and subsequent versions of the

356 manuscript. All authors read and approved the final manuscript, and declared no competing  
357 interest.

## 358 **References**

- 359 1. World Health Organization. World Malaria Report 2023 [Internet]. World Health  
360 Organization; 2023. Available from:  
361 <https://www.who.int/publications/i/item/9789240086173>
- 362 2. Popkin Hall ZR, Seth MD, Madebe RA, Budodo R, Bakari C, Francis F, et al. Malaria  
363 species positivity rates among symptomatic individuals across regions of differing  
364 transmission intensities in Mainland Tanzania. *J Infect Dis* [Internet]. 2023 Nov 22;  
365 Available from: <http://dx.doi.org/10.1093/infdis/jiad522>
- 366 3. Popkin-Hall ZR, Seth MD, Madebe RA, Budodo R, Bakari C, Francis F, et al. Prevalence  
367 of non-falciparum malaria infections among asymptomatic individuals in four regions of  
368 Mainland Tanzania. *Parasit Vectors* [Internet]. 2024;17(1):153. Available from:  
369 <https://doi.org/10.1186/s13071-024-06242-4>
- 370 4. Sendor R, Mitchell CL, Chacky F, Mohamed A, Mhamilawa LE, Molteni F, et al. Similar  
371 Prevalence of Plasmodium falciparum and Non-P. falciparum Malaria Infections among  
372 Schoolchildren, Tanzania<sup>1</sup>. *Emerg Infect Dis* [Internet]. 2023 Jun;29(6):1143–53.  
373 Available from: <http://dx.doi.org/10.3201/eid2906.221016>
- 374 5. National Malaria Control Programme (NMCP). “National Malaria Strategic Plan 2021-  
375 2025: Transitioning to Malaria Elimination Phase”, Tanzania Ministry of Health,  
376 Community Development, Gender, Elderly and Children. Dodoma; 2020 p. 1–179.
- 377 6. World Health Organization. Global-report-on-insecticide-resistance-in-malaria-vectors-  
378 2010-2016 [Internet]. 2018. Available from: <https://fundacionio.com/wp->

- 379 content/uploads/2020/11/Global-report-on-insecticide-resistance-in-malaria-vectors-2010-  
380 2016.pdf
- 381 7. World Health Organization. Report on antimalarial drug efficacy, resistance and response:  
382 10 years of surveillance (2010-2019). World Health Organization; 2020.
- 383 8. Watson OJ, Tran TNA, Zupko RJ, Symons T, Thomson R, Visser T, et al. Global risk of  
384 selection and spread of Plasmodium falciparum histidine-rich protein 2 and 3 gene  
385 deletions. medRxiv. 2023;
- 386 9. Thawer SG, Golumbeanu M, Munisi K, Aaron S, Chacky F, Lazaro S, et al. The use of  
387 routine health facility data for micro-stratification of malaria risk in mainland Tanzania.  
388 Malar J [Internet]. 2022 Nov;21(1):345. Available from: [http://dx.doi.org/10.1186/s12936-](http://dx.doi.org/10.1186/s12936-022-04364-7)  
389 022-04364-7
- 390 10. Rumisha SF, Shayo EH, Mboera LEG. Spatio-temporal prevalence of malaria and  
391 anaemia in relation to agro-ecosystems in Mvomero district, Tanzania. Malar J.  
392 2019;18(1):1–14.
- 393 11. Ishengoma DS, Mmbando BP, Mandara CI, Chiduo MG, Francis F, Timiza W, et al.  
394 Trends of Plasmodium falciparum prevalence in two communities of Muheza district  
395 North-eastern Tanzania: correlation between parasite prevalence, malaria interventions  
396 and rainfall in the context of re-emergence of malaria after two decades of progressive.  
397 Malar J [Internet]. 2018 Jul;17(1):252. Available from: [http://dx.doi.org/10.1186/s12936-](http://dx.doi.org/10.1186/s12936-018-2395-1)  
398 018-2395-1
- 399 12. Mandai SS, Francis F, Challe DP, Seth MD, Madebe RA, Petro DA, et al. High prevalence  
400 and risk of malaria among asymptomatic individuals from villages with high rates of  
401 artemisinin partial resistance in Kyerwa district, North-western Tanzania. medRxiv.

- 402 2023;2010–23.
- 403 13. Dondorp AM, Nosten F, Yi P, Das D, Phyo AP, Tarning J, et al. Artemisinin resistance in  
404 *Plasmodium falciparum* malaria. *N Engl J Med*. 2009;361(5):455–67.
- 405 14. Noedl H, Se Y, Schaecher K, Smith BL, Socheat D, Fukuda MM. Evidence of artemisinin-  
406 resistant malaria in western Cambodia. *N Engl J Med*. 2008;359(24):2619–20.
- 407 15. Uwimana A, Legrand E, Stokes BH, Ndikumana JLM, Warsame M, Umulisa N, et al.  
408 Emergence and clonal expansion of in vitro artemisinin-resistant *Plasmodium falciparum*  
409 kelch13 R561H mutant parasites in Rwanda. *Nat Med*. 2020;26(10):1602–8.
- 410 16. Uwimana A, Umulisa N, Venkatesan M, Szigel SS, Zhou Z, Munyaneza T, et al.  
411 Association of *Plasmodium falciparum* kelch13 R561H genotypes with delayed parasite  
412 clearance in Rwanda: an open-label, single-arm, multicentre, therapeutic efficacy study.  
413 *Lancet Infect Dis*. 2021;21(8):1120–8.
- 414 17. Balikagala B, Fukuda N, Ikeda M, Katuro OT, Tachibana SI, Yamauchi M, et al. Evidence  
415 of artemisinin-resistant malaria in Africa. *N Engl J Med*. 2021;385(13):1163–71.
- 416 18. Ishengoma DS, Mandara CI, Bakari C, Fola AA, Madebe RA, Seth MD, et al. Evidence of  
417 artemisinin partial resistance in North-western Tanzania: clinical and drug resistance  
418 markers study. *medRxiv [Internet]*. 2024 Feb 1; Available from:  
419 <http://dx.doi.org/10.1101/2024.01.31.24301954>
- 420 19. Mihreteab S, Platon L, Berhane A, Stokes BH, Warsame M, Campagne P, et al.  
421 Increasing Prevalence of Artemisinin-Resistant HRP2-Negative Malaria in Eritrea. *N Engl*  
422 *J Med [Internet]*. 2023 Sep 28;389(13):1191–202. Available from:  
423 <http://dx.doi.org/10.1056/NEJMoa2210956>
- 424 20. Fola AA, Feleke SM, Mohammed H, Brhane BG, Hennelly CM, Assefa A, et al.



- 425 Plasmodium falciparum resistant to artemisinin and diagnostics have emerged in Ethiopia.  
426 Nat Microbiol [Internet]. 2023 Oct;8(10):1911–9. Available from:  
427 <http://dx.doi.org/10.1038/s41564-023-01461-4>
- 428 21. Jalei AA, Na-Bangchang K, Muhamad P, Chaijaroenkul W. Monitoring antimalarial drug-  
429 resistance markers in Somalia. Parasites Hosts Dis [Internet]. 2023 Feb;61(1):78–83.  
430 Available from: <http://dx.doi.org/10.3347/PHD.22140>
- 431 22. Mohamed AO, Hussien M, Mohamed A, Suliman A, Elkando NS, Abdelbagi H, et al.  
432 Assessment of Plasmodium falciparum drug resistance molecular markers from the Blue  
433 Nile State, Southeast Sudan. Malar J [Internet]. 2020 Feb 18;19(1):78. Available from:  
434 <http://dx.doi.org/10.1186/s12936-020-03165-0>
- 435 23. Molina-de la Fuente I, Sagrado Benito MJ, Ousley J, Gisbert F de B, García L, González  
436 V, et al. Screening for K13-Propeller Mutations Associated with Artemisinin Resistance in  
437 Plasmodium falciparum in Yambio County (Western Equatoria State, South Sudan). Am J  
438 Trop Med Hyg [Internet]. 2023 Nov 1;109(5):1072–6. Available from:  
439 <http://dx.doi.org/10.4269/ajtmh.23-0382>
- 440 24. Owoloye A, Olufemi M, Idowu ET, Oyebola KM. Prevalence of potential mediators of  
441 artemisinin resistance in African isolates of Plasmodium falciparum. Malar J [Internet].  
442 2021 Dec 2;20(1):451. Available from: <http://dx.doi.org/10.1186/s12936-021-03987-6>
- 443 25. Juliano JJ, Giesbrecht DJ, Simkin A, Fola AA, Lyimo BM, Pereus D, et al. Country wide  
444 surveillance reveals prevalent artemisinin partial resistance mutations with evidence for  
445 multiple origins and expansion of high level sulfadoxine-pyrimethamine resistance  
446 mutations in northwest Tanzania. medRxiv [Internet]. 2023 Nov 30; Available from:  
447 <http://dx.doi.org/10.1101/2023.11.07.23298207>

- 448 26. World Health Organization. Strategy to respond to antimalarial drug resistance in Africa  
449 2022 [Internet]. Vol. 04. Geneva, Switzerland: World Health Organization; 2022. Available  
450 from:  
451 [https://www.who.int/publications/i/item/9789240060265%0Ahttps://cdn.who.int/media/docs](https://www.who.int/publications/i/item/9789240060265%0Ahttps://cdn.who.int/media/docs/default-source/malaria/who-antimalarial-drug-resistance-strategy-for-consultation.pdf?sfvrsn=9d4eaa0_6)  
452 [/default-source/malaria/who-antimalarial-drug-resistance-strategy-for-](https://www.who.int/publications/i/item/9789240060265%0Ahttps://cdn.who.int/media/docs/default-source/malaria/who-antimalarial-drug-resistance-strategy-for-consultation.pdf?sfvrsn=9d4eaa0_6)  
453 [consultation.pdf?sfvrsn=9d4eaa0\\_6](https://www.who.int/publications/i/item/9789240060265%0Ahttps://cdn.who.int/media/docs/default-source/malaria/who-antimalarial-drug-resistance-strategy-for-consultation.pdf?sfvrsn=9d4eaa0_6)
- 454 27. Zupko RJ, Nguyen TD, Ngabonziza JCS, Kabera M, Li H, Tran TNA, et al. Modeling policy  
455 interventions for slowing the spread of artemisinin-resistant pfcy27D mutations in  
456 Rwanda. *Nat Med* [Internet]. 2023 Nov;29(11):2775–84. Available from:  
457 <http://dx.doi.org/10.1038/s41591-023-02551-w>
- 458 28. National Malaria Control Programme (NMCP). Ministry Of Health, Community  
459 Development, Gender, Elderly and Children, “National Guidelines For Malaria Diagnosis,  
460 Treatment And Preventive Therapies.” Dodoma; 2020.
- 461 29. Tewara MA, Mbah-Fongkimeh PN, Dayimu A, Kang F, Xue F. Small-area spatial statistical  
462 analysis of malaria clusters and hotspots in Cameroon;2000–2015. *BMC Infect Dis*  
463 [Internet]. 2018 Dec 7;18(1):636. Available from: [https://doi.org/10.1186/s12879-018-](https://doi.org/10.1186/s12879-018-3534-6)  
464 [3534-6](https://doi.org/10.1186/s12879-018-3534-6)
- 465 30. Saxena R, Nagpal BN, Das MK, Srivastava A, Gupta SK, Kumar A, et al. A spatial  
466 statistical approach to analyze malaria situation at micro level for priority control in Ranchi  
467 district, Jharkhand. *Indian J Med Res* [Internet]. 2012 Nov;136(5):776–82. Available from:  
468 <https://www.ncbi.nlm.nih.gov/pubmed/23287124>
- 469 31. Ministry of Health Community Development Gender Elderly & Children, National Malaria  
470 Control Programme. Supplementary malaria midterm strategic plan 2018–2020. 2019.

- 471 32. Ministry of Health, Community Development, Gender, Elderly and Children, National  
472 Malaria Control Programme. Consultative Malaria Expert Meeting Report 2018. 2018.
- 473 33. Nundu SS, Culleton R, Simpson SV, Arima H, Muyembe JJ, Mita T, et al. Malaria parasite  
474 species composition of Plasmodium infections among asymptomatic and symptomatic  
475 school-age children in rural and urban areas of Kinshasa, Democratic Republic of Congo.  
476 *Malar J.* 2021;20:1–13.
- 477 34. Sultana M, Sheikh N, Mahumud RA, Jahir T, Islam Z, Sarker AR. Prevalence and  
478 associated determinants of malaria parasites among Kenyan children. *Trop Med Health.*  
479 2017;45:1–9.
- 480 35. Mbah CE, Ambe LA, Ngwewondo A, Kidzeru EB, Akwah L, Mountchissi C, et al. A  
481 Comparative Study of Asymptomatic Malaria in a Forest Rural and Depleted Forest Urban  
482 Setting during a Low Malaria Transmission and COVID-19 Pandemic Period. *Biomed Res*  
483 *Int.* 2022;2022.
- 484 36. Bofu RM, Santos EM, Msugupakulya BJ, Kahamba NF, Swilla JD, Njalambaha R, et al.  
485 The needs and opportunities for housing improvement for malaria control in southern  
486 Tanzania. *Malar J.* 2023;22(1):69.
- 487 37. Tusting LS, Rek J, Arinaitwe E, Staedke SG, Kanya MR, Cano J, et al. Why is malaria  
488 associated with poverty? Findings from a cohort study in rural Uganda. *Infectious*  
489 *Diseases of Poverty* [Internet]. 2016 Aug;5(1):78. Available from:  
490 <http://dx.doi.org/10.1186/s40249-016-0164-3>
- 491 38. McCann RS, van den Berg H, Diggle PJ, van Vugt M, Terlouw DJ, Phiri KS, et al.  
492 Assessment of the effect of larval source management and house improvement on  
493 malaria transmission when added to standard malaria control strategies in southern

- 494 Malawi: study protocol for a cluster-randomized controlled trial. BMC Infect Dis [Internet].  
495 2017 Sep 22;17(1):639. Available from: <http://dx.doi.org/10.1186/s12879-017-2749-2>
- 496 39. Orkoh E, Efobi U. Effects of Behaviour Change Communication on Knowledge and  
497 Prevention of Malaria Among Women in Ghana. Eval Rev [Internet]. 2023 Aug  
498 11;193841X231194565. Available from: <http://dx.doi.org/10.1177/0193841X231194565>
- 499 40. Dabaro D, Birhanu Z, Negash A, Hawaria D, Yewhalaw D. Effects of rainfall, temperature,  
500 and topography on malaria incidence in elimination targeted district of Ethiopia. Malar J.  
501 2021;20(1):1–10.
- 502 41. Finda MF, Moshi IR, Monroe A, Limwagu AJ, Nyoni AP, Swai JK, et al. Linking human  
503 behaviors and malaria vector biting risk in south-eastern Tanzania. PLoS One.  
504 2019;14(6):e0217414.
- 505 42. Kihwele F, Gavana T, Makungu C, Msuya HM, Mlacha YP, Govella NJ, et al. Exploring  
506 activities and behaviors potentially increases school-age children’s vulnerability to malaria  
507 infections in south-eastern Tanzania. Malar J. 2023;22(1):293.
- 508 43. Kihwele F, Gavana T, Makungu C, Msuya HM, Govella NJ, Mlacha YP, et al. Outdoor  
509 activities and behaviors increase the vulnerability of school-age children to malaria  
510 infections in south-eastern Tanzania [Internet]. Research Square. 2023. Available from:  
511 <https://www.researchsquare.com/article/rs-2832075/v1>
- 512 44. Yukich J, Stuck L, Scates S, Wisniewski J, Chacky F, Festo C, et al. Sustaining LLIN  
513 coverage with continuous distribution: the school net programme in Tanzania. Malar J  
514 [Internet]. 2020;19:158. Available from: <http://dx.doi.org/10.1186/s12936-020-03222-8>
- 515 45. Chacky F, Runge M, Rumisha SF, Machafuko P, Chaki P, Massaga JJ, et al. Nationwide  
516 school malaria parasitaemia survey in public primary schools, the United Republic of

- 517 Tanzania [Internet]. Vol. 17, Malar J. 2023. Available from:  
518 <http://dx.doi.org/10.1186/s12936-018-2601-1>
- 519 46. Kigozi SP, Kigozi RN, Epstein A, Mpimbaza A, Sserwanga A, Yeka A, et al. Rapid shifts in  
520 the age-specific burden of malaria following successful control interventions in four  
521 regions of Uganda. Malar J [Internet]. 2020 Mar 30;19(1):128. Available from:  
522 <http://dx.doi.org/10.1186/s12936-020-03196-7>
- 523 47. Dida GO, Anyona DN, Abuom PO, Akoko D, Adoka SO, Matano AS, et al. Spatial  
524 distribution and habitat characterization of mosquito species during the dry season along  
525 the Mara River and its tributaries, in Kenya and Tanzania. Infectious diseases of poverty.  
526 2018;7(1):1–16.
- 527 48. Fornace KM, Diaz AV, Lines J, Drakeley CJ. Achieving global malaria eradication in  
528 changing landscapes. Malar J. 2021;20(1):1–14.
- 529 49. Boni MF, White NJ, Baird JK. The Community As the Patient in Malaria-Endemic Areas:  
530 Preempting Drug Resistance with Multiple First-Line Therapies. PLoS Med [Internet]. 2016  
531 Mar;13(3):e1001984. Available from: <http://dx.doi.org/10.1371/journal.pmed.1001984>
- 532 50. Boni MF. Breaking the cycle of malaria treatment failure. Front Epidemiol [Internet]. 2022  
533 Dec 14;2:1041896. Available from: <http://dx.doi.org/10.3389/fepid.2022.1041896>

## 534 **Appendices**

535 **Appendix A.** Description of the study site

536 **Appendix B.** Administrative units and health facilities in Kagera region that were included in the analysis

537 **Appendix C:** Stratification of malaria burden in Kagera region

538 **Appendix D:** Description of spatial autocorrelation analysis

539 **Appendix E:** Description of wards and schools selected for school malaria parasitological surveys

540 **Appendix Figure 1.** Descriptive summary of the wards and health facilities included in the analysis

541 **Appendix Figure 2** Comparison of malaria test positivity rates in Kagera region from 2017 to 2023 based on  
542 the data from health facilities

543 **Appendix Figure 3.** Comparison of malaria prevalence in Kagera region from 2017 to 2023 based on the  
544 data from pregnant women and school children

545 **Appendix Figure 4** Locations of hotspots and coldspots of malaria in under-fives at ward level in Kagera  
546 region from 2017 to 2023

547 **Appendix Figure 5** Locations of hotspots and coldspots of malaria in patients aged  $\geq 5$  years at ward level in  
548 Kagera region from 2017 to 2023

549 **Appendix Figure 6.** Locations of hotspots and coldspots of malaria in pregnant women at ward level in  
550 Kagera region from 2017 to 2023

551 **Appendix Table 1.** Cut-offs adopted to categorize councils/wards in Kagera region into different risk strata

552 **Appendix Table 2.** Number of wards by year in each stratum of malaria test positivity rates in under-fives in  
553 Kagera region from 2017 to 2023

554 **Appendix Table 3.** Number of wards by year in each stratum of malaria test positivity rates in patients aged  $\geq 5$   
555 years in Kagera region from 2017 to 2023

556 **Appendix Table 4.** Ward names by council that had a high, moderate, low, and very low malaria test positivity  
557 rates in under-fives and  $\geq 5$  years from 2017 to 2023, Kagera region

558 **Appendix Table 5.** Number of wards by year in each stratum of malaria prevalence in pregnant women in Kagera  
559 region from 2017 to 2023

560 **Appendix Table 6.** Ward names by council that had a high, moderate, low, and very low malaria prevalence in  
561 pregnant women from 2017 to 2023, Kagera region

562 **Appendix Table 7.** Number of wards by year in each stratum of malaria prevalence in school children in Kagera  
563 region from 2017 to 2023

564 **Appendix Table 8.** Ward names by council that had a high, moderate, low, and very low malaria prevalence in  
565 school children from 2017 to 2023, Kagera region

566 **Appendix Table 9.** Overall malaria burden at ward level in Kagera region by years and study groups from  
567 2015 to 2023

568 **Appendix Table 10.** Names of hotspots of malaria burden at ward level in Kagera region at 95% and 99%  
569 confidence levels from 2017 to 2023

570 **Appendix Table 11.** Names of coldspots of malaria burden at ward level in Kagera region at 95% and 99%  
571 confidence levels from 2017 to 2023
